# Supplementary material for: Sulfur compounds reactivity in the ODS of model and real feeds on W–SBA based catalysts
Source: PubMed Central journal article supplement — RSC Adv. 2018 Apr 12;8(25):13714–21. doi: 10.1039/c8ra01542b (PMC9079807; doi:10.1039/c8ra01542b), 2018-04-12
Supplement: RA-008-C8RA01542B-s001.pdf [file RA-008-C8RA01542B-s001.pdf]

## Supplementary Informations

### Sulfur compounds reactivity in the ODS of model and real feeds on W-SBA based catalysts.

G. Estephane,<sup>a</sup> C. Lancelot,<sup>a\*</sup> P. Blanchard,<sup>a</sup> J. Toufaily,<sup>b</sup> T. Hamiyeb<sup>b</sup> and C. Lamonier,<sup>a</sup>

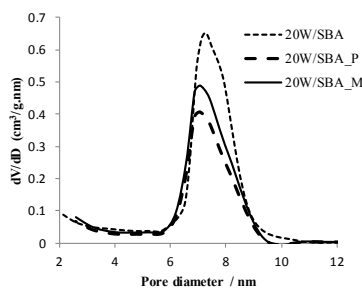

Figure SI 1: pore size distribution of catalyst 20W/SBA and of 20W/SBA\_P and 20W/SBA\_M (after test and washing with pentane and methanol).

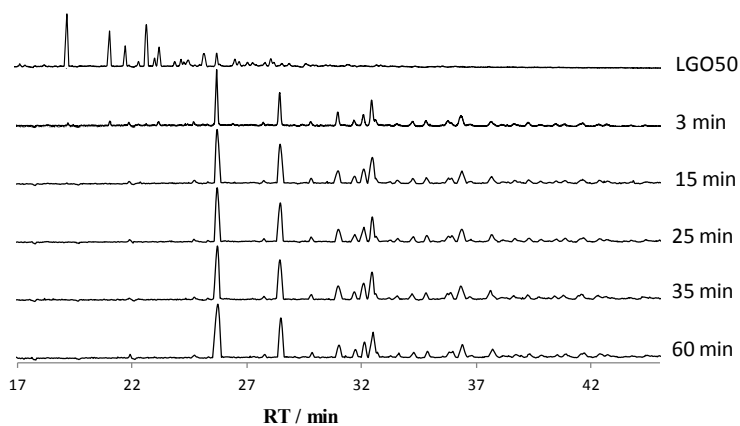

Figure SI 2: chromatograms of the reaction mixture in the ODS of LGO50 on 11W/SBA.

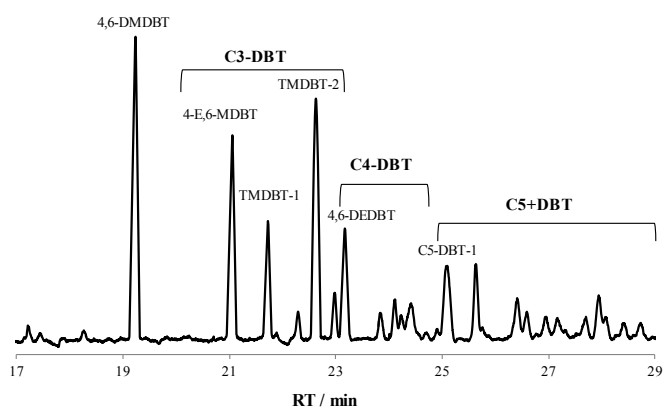

Figure SI 3: sulfide species identified for further monitoring of their evolution in the ODS of LGO50.

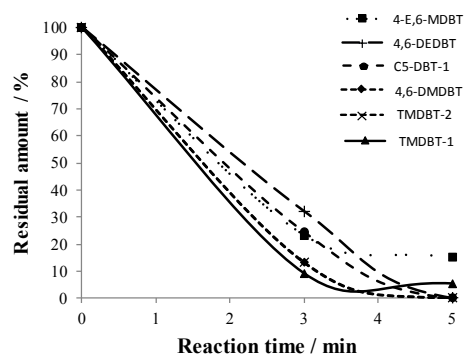

Figure SI 4: Percentages of residual concentrations of the 6 selected species in the ODS of LGO50 on 11W/SBA (evolution of 4,6-DMDBT and TMDBT-2 are superimposed).

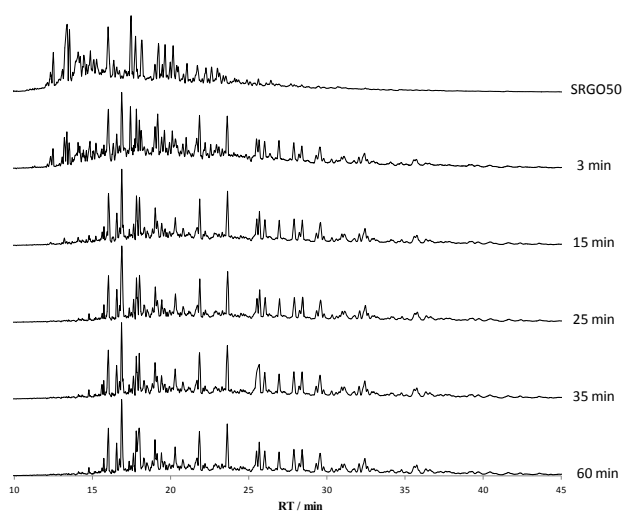

Figure SI 5: chromatograms of the reaction mixture in the ODS of SRGO2000 on 11W/SBA.

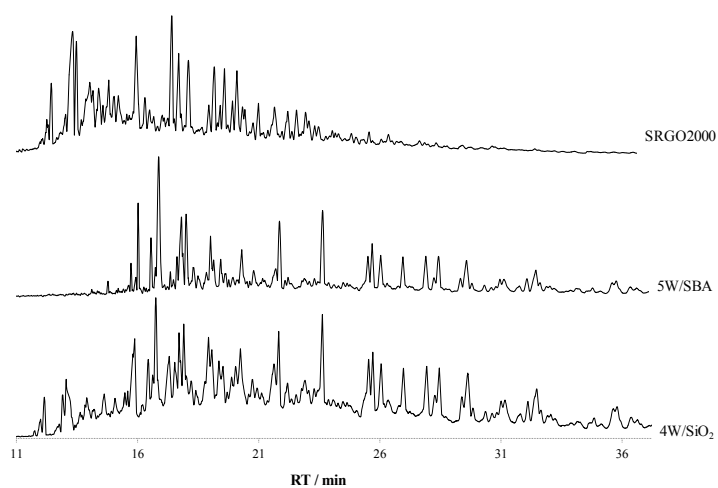

Figure SI 6: chromatograms of the reaction mixture in the ODS of SRGO2000 on 4W/SiO<sub>2</sub>.

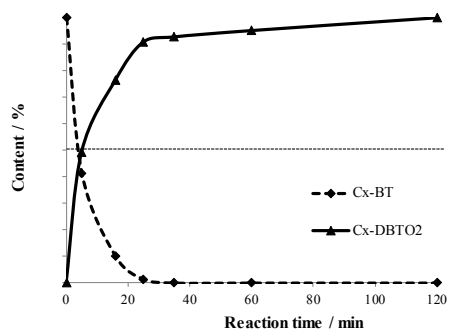

Figure SI 7: Evolution of Cx-BTs and Cx-DBT sulfones in the ODS of SRGO2000 on 11W/SBA.
